# Supplementary material
Source: ML conference proceedings conference paper supplement (https://proceedings.neurips.cc/paper_files/paper/2020/hash/1b33d16fc562464579b7199ca3114982-Abstract.html)
Supplement: Supplementary file [file 1b33d16fc562464579b7199ca3114982-Supplemental.pdf]

## A Linear regression with Gaussian features

In the setting of Section 2.1, we assume  $X$  to be centered Gaussian process of covariance  $\Sigma$  where  $\Sigma$  is a bounded symmetric semidefinite operator. As  $X$  is not bounded a.s., we need to use the weaker set of assumptions given in Remark 3. We thus need to compute  $R_0$  such that  $\mathbb{E}[\|X\|^2 X \otimes X] \preceq R_0 \Sigma$  and  $\alpha, R_\alpha$  such that  $\mathbb{E}[\langle X, \Sigma^{-\alpha} X \rangle X \otimes X] \preceq R_\alpha \Sigma$ . We show here that these conditions are in fact simple trace conditions on  $\Sigma$ , sometimes called *capacity conditions* [25].

**Lemma 1.** *If  $X \sim \mathcal{N}(0, \Sigma)$  and  $A$  is a bounded symmetric operator such that  $\text{Tr}(\Sigma A) < \infty$ ,*

$$\mathbb{E}[\langle X, AX \rangle X \otimes X] = 2\Sigma A \Sigma + \text{Tr}(\Sigma A) \Sigma \preceq \left( 2\|\Sigma^{1/2} A \Sigma^{1/2}\|_{\mathcal{H} \rightarrow \mathcal{H}} + \text{Tr}(\Sigma A) \right) \Sigma.$$

*Proof.* Diagonalize  $\Sigma = \sum_{i \geq 1} \lambda_i e_i \otimes e_i$ . Then there exists independent standard Gaussian random variables  $X_i, i \geq 0$  such that  $X = \sum_i \lambda_i^{1/2} X_i e_i$ .

Let  $i, j \geq 1$ .

$$\begin{aligned} \langle e_i, \mathbb{E}[\langle X, AX \rangle X \otimes X] e_j \rangle &= \mathbb{E}[\langle X, AX \rangle \langle e_i, X \otimes X e_j \rangle] = \mathbb{E}[\langle X, AX \rangle \lambda_i^{1/2} X_i \lambda_j^{1/2} X_j] \\ &= \lambda_i^{1/2} \lambda_j^{1/2} \sum_{k,l} A_{k,l} \lambda_k^{1/2} \lambda_l^{1/2} \mathbb{E}[X_i X_j X_k X_l]. \end{aligned}$$

As  $X_i, i \geq 1$  are centered independent random variables, the quantity  $\mathbb{E}[X_i X_j X_k X_l]$  is 0 in many cases. More precisely,

- if  $i \neq j$ , the general term of the sum is non-zero only when  $k = i$  and  $l = j$  or  $k = j$  and  $l = i$ . This gives

$$\langle e_i, \mathbb{E}[\langle X, AX \rangle X \otimes X] e_j \rangle = 2A_{i,j} \lambda_i \lambda_j.$$

- if  $i = j$ , the general term of the sum is non-zero only when  $k = l$ . This gives

$$\begin{aligned} \langle e_i, \mathbb{E}[\langle X, AX \rangle X \otimes X] e_i \rangle &= \lambda_i \sum_k A_{k,k} \lambda_k \mathbb{E}[X_i^2 X_k^2] = \lambda_i \sum_{k \neq i} A_{k,k} \lambda_k + 3\lambda_i^2 A_{i,i} \\ &= \lambda_i \sum_k A_{k,k} \lambda_k + 2\lambda_i^2 A_{i,i}. \end{aligned}$$

In both cases,

$$\langle e_i, \mathbb{E}[\langle X, AX \rangle X \otimes X] e_j \rangle = 2\lambda_i \lambda_j A_{i,j} + \left( \sum_k A_{k,k} \lambda_k \right) \lambda_i \mathbf{1}_{i=j}.$$

Note that

$$\text{Tr}(A \Sigma) = \sum_k \langle e_k, \Sigma A e_k \rangle = \sum_k \lambda_k A_{k,k}.$$

Thus we get

$$\begin{aligned} \langle e_i, \mathbb{E}[\langle X, AX \rangle X \otimes X] e_j \rangle &= 2\lambda_i \lambda_j A_{i,j} + \text{Tr}(A \Sigma) \lambda_i \mathbf{1}_{i=j} \\ &= 2 \langle e_i, \Sigma A \Sigma e_j \rangle + \text{Tr}(A \Sigma) \langle e_i, \Sigma e_j \rangle \\ &= \langle e_i, [2\Sigma A \Sigma + \text{Tr}(\Sigma A) \Sigma] e_j \rangle. \end{aligned}$$

□

From this lemma with  $A = \text{Id}$ , we compute  $R_0 = 2\|\Sigma\|_{\mathcal{H} \rightarrow \mathcal{H}} + \text{Tr}(\Sigma)$ , and with  $A = \Sigma^{-\alpha}$ , we compute  $R_\alpha = 2\|\Sigma\|_{\mathcal{H} \rightarrow \mathcal{H}}^{1-\alpha} + \text{Tr}(\Sigma^{1-\alpha})$ . Thus in the Gaussian case, the condition of (weak) regularity of the features is given by  $\text{Tr}(\Sigma^{1-\alpha}) < \infty$ .

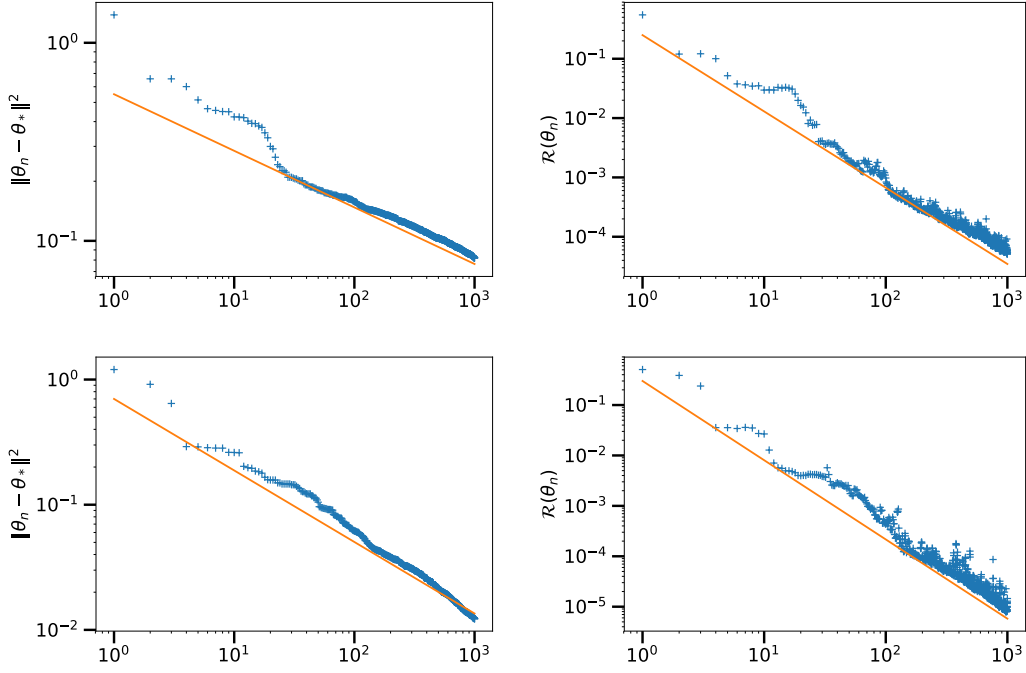

Figure 3: In blue +, evolution of  $\|\theta_n - \theta_*\|^2$  (left) and  $\mathcal{R}(\theta_n)$  (right) as functions of  $n$ , for the problems with parameters  $\beta = 1.4, \delta = 1.2$  (up) and  $\beta = 3.5, \delta = 1.5$ . The orange lines represent the curves  $D/n^{\alpha_*}$  (left) and  $D'/n^{\alpha_*+1}$  (right).

**Simulations.** We present simulations in finite but large dimension  $d = 10^5$ , and we check that dimension-independent bounds describe the observed behavior. We artificially generate regression problems with different regularities by varying the decay of the eigenvalues of the covariance  $\Sigma$  and varying the decay of the coefficients of  $\theta_*$ .

Choose an orthonormal basis  $e_1, \dots, e_d$  of  $\mathcal{H}$ . We define  $\Sigma = \sum_{i=1}^d i^{-\beta} e_i \otimes e_i$  for some  $\beta \geq 1$  and  $\theta_* = \sum_{i=1}^d i^{-\delta} e_i$  for some  $\delta \geq 1/2$ . We now check the condition on  $\alpha$  such that the assumptions (a) and (b) are satisfied.

- (a)  $\langle \theta_*, \Sigma^{-\alpha} \theta_* \rangle = \sum_{i=1}^d \langle \theta_*, e_i \rangle^2 i^{\beta\alpha} = \sum_{i=1}^d i^{-2\delta+\alpha\beta}$ , which is bounded independently of the dimension  $d$  if and only if  $\sum_{i=1}^{\infty} i^{-2\delta+\alpha\beta} < \infty \Leftrightarrow -2\delta + \alpha\beta < -1 \Leftrightarrow \alpha < \frac{2\delta-1}{\beta}$ .
- (b)  $\text{Tr}(\Sigma^{1-\alpha}) = \sum_{i=1}^d i^{-\beta(1-\alpha)}$ , which is bounded independently of the dimension  $d$  if and only if  $\sum_{i=1}^{\infty} i^{-\beta(1-\alpha)} < \infty \Leftrightarrow -\beta(1-\alpha) < -1 \Leftrightarrow \alpha < 1 - 1/\beta$ .

Thus the corollary gives dimension-independent convergence rates for all  $\alpha < \alpha_* = \min\left(1 - \frac{1}{\beta}, \frac{2\delta-1}{\beta}\right)$ .

In Figure 3, we show the evolution of  $\|\theta_n - \theta_*\|^2$  and  $\mathcal{R}(\theta_n)$  for two realizations of SGD. We chose the stepsize  $\gamma = 1/R_0 = 1/(2\|\Sigma\|_{\mathcal{H} \rightarrow \mathcal{H}} + \text{Tr}(\Sigma))$ . The two realizations represent two possible different regimes:

- In the two upper plots,  $\beta = 1.4, \delta = 1.2$ . The irregularity of the feature vectors is the bottleneck for fast convergence. We have  $\alpha_* = \min\left(1 - \frac{1}{\beta}, \frac{2\delta-1}{\beta}\right) \approx \min(0.29, 1) = 0.29$ .
- In the two lower plots,  $\beta = 3.5, \delta = 1.5$ . The irregularity of the optimum is the bottleneck for fast convergence. We have  $\alpha_* = \min\left(1 - \frac{1}{\beta}, \frac{2\delta-1}{\beta}\right) \approx \min(0.71, 0.57) = 0.57$ .

We compare with the curves  $D/n^{\alpha_*}$  and  $D'/n^{\alpha_*+1}$  with hand-tuned constants  $D$  and  $D'$  to fit best the data for each plot. In both regimes, our theory is sharp in predicting the exponents in the polynomial rates of convergence of  $\|\theta_n - \theta_*\|^2$  and  $\mathcal{R}(\theta_n)$ .

## B Proof of Theorems 1 and 3

We recall here the definition of the regularity functions

$$\varphi_n(\beta) = \mathbb{E} \left[ \langle \theta_n - \theta_*, \Sigma^{-\beta} (\theta_n - \theta_*) \rangle \right] \in [0, \infty], \quad \beta \in \mathbb{R}.$$

### B.1 Properties of the regularity functions

We derive here two properties of the sequence of regularity functions  $\varphi_n, n \geq 1$  that are useful for the proof of Theorem 3. The first one is a simple consequence of the above definition of the regularity function. The second property is the closed recurrence relation of the regularity functions  $\varphi_n, n \geq 0$  associated to the iterates of SGD.

**Property 1.** *For all  $n$ , the function  $\varphi_n$  is log-convex, i.e., for all  $\beta_1, \beta_2 \in \mathbb{R}$ , for all  $\lambda \in [0, 1]$ ,*

$$\varphi_n((1-\lambda)\beta_1 + \lambda\beta_2) \leq \varphi_n(\beta_1)^{1-\lambda} \varphi_n(\beta_2)^\lambda.$$

*Proof.* The proof is based on the following lemma, that we state clearly for another use below.

**Lemma 2.** *Let  $\theta \in \mathcal{H}$ . Then for all  $\beta_1, \beta_2 \in \mathbb{R}, \lambda \in [0, 1]$ ,*

$$\langle \theta, \Sigma^{-[(1-\lambda)\beta_1 + \lambda\beta_2]} \theta \rangle \leq \langle \theta, \Sigma^{-\beta_1} \theta \rangle^{1-\lambda} \langle \theta, \Sigma^{-\beta_2} \theta \rangle^\lambda.$$

This lemma follows from Hölder's inequality with  $p = (1-\lambda)^{-1}$  and  $q = \lambda^{-1}$ . Indeed, diagonalize  $\Sigma = \sum_i \mu_i e_i \otimes e_i$ . Then

$$\begin{aligned} \langle \theta, \Sigma^{-[(1-\lambda)\beta_1 + \lambda\beta_2]} \theta \rangle &= \sum_i \mu_i^{-[(1-\lambda)\beta_1 + \lambda\beta_2]} \langle \theta, e_i \rangle^2 \\ &= \sum_i \left( \mu_i^{-\beta_1} \langle \theta, e_i \rangle^2 \right)^{1-\lambda} \left( \mu_i^{-\beta_2} \langle \theta, e_i \rangle^2 \right)^\lambda \\ &\leq \left( \sum_i \mu_i^{-\beta_1} \langle \theta, e_i \rangle^2 \right)^{1-\lambda} \left( \sum_i \mu_i^{-\beta_2} \langle \theta, e_i \rangle^2 \right)^\lambda \\ &= \langle \theta, \Sigma^{-\beta_1} \theta \rangle^{1-\lambda} \langle \theta, \Sigma^{-\beta_2} \theta \rangle^\lambda. \end{aligned}$$

We now apply this lemma to prove Property 1.

$$\begin{aligned} \varphi_n((1-\lambda)\beta_1 + \lambda\beta_2) &= \mathbb{E} \left[ \langle \theta_n - \theta_*, \Sigma^{-[(1-\lambda)\beta_1 + \lambda\beta_2]} (\theta_n - \theta_*) \rangle \right] \\ &\leq \mathbb{E} \left[ \langle \theta_n - \theta_*, \Sigma^{-\beta_1} (\theta_n - \theta_*) \rangle^{1-\lambda} \langle \theta_n - \theta_*, \Sigma^{-\beta_2} (\theta_n - \theta_*) \rangle^\lambda \right]. \end{aligned}$$

Using again Hölder's inequality, we get

$$\begin{aligned} \varphi_n((1-\lambda)\beta_1 + \lambda\beta_2) &\leq \mathbb{E} \left[ \langle \theta_n - \theta_*, \Sigma^{-\beta_1} (\theta_n - \theta_*) \rangle \right]^{1-\lambda} \mathbb{E} \left[ \langle \theta_n - \theta_*, \Sigma^{-\beta_2} (\theta_n - \theta_*) \rangle \right]^\lambda \\ &= \varphi_n(\beta_1)^{1-\lambda} \varphi_n(\beta_2)^\lambda. \end{aligned}$$

□

**Property 2.** *Under the assumptions of Theorem 3, for all  $n$ , the function  $\varphi_n$  is finite on  $(-\infty, \underline{\alpha}]$ , and if  $0 \leq \beta \leq \underline{\alpha}$ ,*

$$\varphi_n(\beta) \leq \varphi_{n-1}(\beta) - 2\gamma\varphi_{n-1}(\beta-1) + \gamma^2 R_0^{1-\beta/\underline{\alpha}} R_{\underline{\alpha}}^{\beta/\underline{\alpha}} \varphi_{n-1}(-1).$$

*Proof.* By assumption (a),  $\varphi_0(\underline{\alpha}) = \|\Sigma^{-\alpha/2}\theta_*\|^2$  is finite, i.e., there exists  $\theta \in \mathcal{H}$  such that  $\theta_* = \Sigma^{\alpha/2}\theta$ . Then for any  $\beta \leq \underline{\alpha}$ ,  $\theta_* = \Sigma^{\beta/2}(\Sigma^{(\alpha-\beta)/2}\theta)$  thus  $\varphi_0(\beta) = \|\Sigma^{-\beta/2}\theta_*\|^2$  is finite.

Further, assume that for some  $n$ , the function  $\varphi_{n-1}$  is finite on  $(\infty, \underline{\alpha}]$ . Then we can rewrite the stochastic gradient iteration (1) as

$$\theta_n - \theta_* = (\text{Id} - \gamma X_n \otimes X_n)(\theta_{n-1} - \theta_*).$$

Substituting this expression in the definition of  $\varphi_n$  and expanding the formula, we get

$$\begin{aligned} \varphi_n(\beta) &= \mathbb{E} [\langle \theta_n - \theta_*, \Sigma^{-\beta}(\theta_n - \theta_*) \rangle] \\ &= \mathbb{E} [\langle (\text{Id} - \gamma X_n \otimes X_n)(\theta_{n-1} - \theta_*), \Sigma^{-\beta}(\text{Id} - \gamma X_n \otimes X_n)(\theta_{n-1} - \theta_*) \rangle] \\ &= \mathbb{E} [\langle \theta_{n-1} - \theta_*, \Sigma^{-\beta}(\theta_{n-1} - \theta_*) \rangle] \end{aligned} \quad (8)$$

$$- 2\gamma \mathbb{E} [\langle \theta_{n-1} - \theta_*, \Sigma^{-\beta} X_n \otimes X_n(\theta_{n-1} - \theta_*) \rangle] \quad (9)$$

$$+ \gamma^2 \mathbb{E} [\langle \theta_{n-1} - \theta_*, X_n \otimes X_n \Sigma^{-\beta} X_n \otimes X_n(\theta_{n-1} - \theta_*) \rangle]. \quad (10)$$

Note that the first term of this sum is  $\varphi_{n-1}(\beta)$ . Further,  $\theta_{n-1}$  is computed using only  $(X_1, Y_1), \dots, (X_{n-1}, Y_{n-1})$ , thus it is independent of  $X_n$ . It follows that

$$\begin{aligned} \mathbb{E} [\langle \theta_{n-1} - \theta_*, \Sigma^{-\beta} X_n \otimes X_n(\theta_{n-1} - \theta_*) \rangle] &= \mathbb{E} [\langle \theta_{n-1} - \theta_*, \Sigma^{-\beta} \mathbb{E}[X_n \otimes X_n] (\theta_{n-1} - \theta_*) \rangle] \\ &= \mathbb{E} [\langle \theta_{n-1} - \theta_*, \Sigma^{-\beta+1}(\theta_{n-1} - \theta_*) \rangle] \\ &= \varphi_{n-1}(\beta - 1). \end{aligned} \quad (11)$$

Finally,

$$\mathbb{E} [\langle \theta_{n-1} - \theta_*, X_n \otimes X_n \Sigma^{-\beta} X_n \otimes X_n(\theta_{n-1} - \theta_*) \rangle] \quad (12)$$

$$= \mathbb{E} [\langle \theta_{n-1} - \theta_*, X_n \rangle^2 \langle X_n, \Sigma^{-\beta} X_n \rangle] \quad (13)$$

We now assume that  $0 \leq \beta \leq \underline{\alpha}$ . We apply Lemma 2 with  $\beta_1 = 0, \beta_2 = \underline{\alpha}, \lambda = \beta/\underline{\alpha}$ :

$$\langle X_n, \Sigma^{-\beta} X_n \rangle \leq \|X_n\|^{2(1-\beta/\underline{\alpha})} \langle X_n, \Sigma^{-\underline{\alpha}} X_n \rangle^{\beta/\underline{\alpha}}$$

Let  $E_{X_n}$  denote the expectation with respect to  $X_n$  only, while keeping  $X_0, \dots, X_{n-1}$  random. Applying Hölder's inequality, we get

$$\begin{aligned} &\mathbb{E}_{X_n} [\langle X_n, \Sigma^{-\beta} X_n \rangle \langle \theta_{n-1} - \theta_*, X_n \rangle^2] \\ &\leq \mathbb{E}_{X_n} [\|X_n\|^{2(1-\beta/\underline{\alpha})} \langle X_n, \Sigma^{-\underline{\alpha}} X_n \rangle^{\beta/\underline{\alpha}} \langle \theta_{n-1} - \theta_*, X_n \rangle^2] \\ &\leq \mathbb{E}_{X_n} [\|X_n\|^2 \langle \theta_{n-1} - \theta_*, X_n \rangle^2]^{1-\beta/\underline{\alpha}} \mathbb{E} [\langle X_n, \Sigma^{-\underline{\alpha}} X_n \rangle \langle \theta_{n-1} - \theta_*, X_n \rangle^2]^{\beta/\underline{\alpha}} \\ &= \langle \theta_{n-1} - \theta_*, \mathbb{E} [\|X_n\|^2 X_n \otimes X_n] (\theta_{n-1} - \theta_*) \rangle^{1-\beta/\underline{\alpha}} \\ &\quad \times \langle \theta_{n-1} - \theta_*, \mathbb{E} [\langle X_n, \Sigma^{-\underline{\alpha}} X_n \rangle X_n \otimes X_n] (\theta_{n-1} - \theta_*) \rangle^{\beta/\underline{\alpha}} \\ &\leq R_0^{1-\beta/\underline{\alpha}} R_{\underline{\alpha}}^{\beta/\underline{\alpha}} \langle \theta_{n-1} - \theta_*, \Sigma(\theta_{n-1} - \theta_*) \rangle, \end{aligned}$$

where in this last step, we use the assumptions that the features  $X$  are bounded and regular, in their weak formulation of Remark 3. Returning to the computation of (12)-(13), we get

$$\begin{aligned} &\mathbb{E} [\langle \theta_{n-1} - \theta_*, X_n \otimes X_n \Sigma^{-\beta} X_n \otimes X_n(\theta_{n-1} - \theta_*) \rangle] \\ &= \mathbb{E} [\mathbb{E}_{X_n} [\langle \theta_{n-1} - \theta_*, X_n \rangle^2 \langle X_n, \Sigma^{-\beta} X_n \rangle]] \end{aligned} \quad (14)$$

$$\begin{aligned} &\leq R_0^{1-\beta/\underline{\alpha}} R_{\underline{\alpha}}^{\beta/\underline{\alpha}} \mathbb{E} [\langle \theta_{n-1} - \theta_*, \Sigma(\theta_{n-1} - \theta_*) \rangle] \\ &= R_0^{1-\beta/\underline{\alpha}} R_{\underline{\alpha}}^{\beta/\underline{\alpha}} \varphi_{n-1}(-1). \end{aligned} \quad (15)$$

The result is obtained by putting together Equations (8)-(10), (11) and (15).  $\square$

## B.2 Proof of Theorem 1

A remarkable feature of the proof that follows is that only Properties 1 and 2 of the regularity functions are used to derive the theorem. In particular, we do not use the definition of the regularity functions  $\varphi_n$  in this section.

We start with a few preliminary remarks. Using the recurrence Property 2 and that  $\gamma R_0 \leq 1$ ,

$$\begin{aligned}\varphi_k(0) &\leq \varphi_{k-1}(0) - \gamma(2 - \gamma R_0) \varphi_{k-1}(-1) \\ &\leq \varphi_{k-1}(0) - \gamma \varphi_{k-1}(-1).\end{aligned}$$

Thus the sequence  $\varphi_k(0)$ ,  $k \geq 0$  decreases, and

$$\gamma \varphi_{k-1}(-1) \leq \varphi_{k-1}(0) - \varphi_k(0). \quad (16)$$

By summing this inequality over  $k \geq 1$ , we get

$$\gamma \sum_{k=0}^{\infty} \varphi_k(-1) \leq \varphi_0(0). \quad (17)$$

Using again the recurrence Property 2,

$$\begin{aligned}\varphi_k(\underline{\alpha}) &\leq \varphi_{k-1}(\underline{\alpha}) - 2\gamma \varphi_{k-1}(\underline{\alpha} - 1) + \gamma^2 R_{\underline{\alpha}} \varphi_{k-1}(-1) \\ &\leq \varphi_{k-1}(\underline{\alpha}) + \gamma^2 R_{\underline{\alpha}} \varphi_{k-1}(-1).\end{aligned} \quad (18)$$

By summing for  $k = 1, \dots, n$  and using the bound (17),

$$\begin{aligned}\varphi_n(\underline{\alpha}) &\leq \varphi_0(\underline{\alpha}) + \gamma^2 R_{\underline{\alpha}} \sum_{k=0}^{n-1} \varphi_k(-1) \\ &\leq \varphi_0(\underline{\alpha}) + \gamma R_{\underline{\alpha}} \varphi_0(0) \\ &\leq \varphi_0(\underline{\alpha}) + \frac{R_{\underline{\alpha}}}{R_0} \varphi_0(0).\end{aligned} \quad (19)$$

In words, the sequence  $\varphi_n(\underline{\alpha})$ ,  $n \geq 0$  is bounded by  $D := \varphi_0(\underline{\alpha}) + \frac{R_{\underline{\alpha}}}{R_0} \varphi_0(0)$ . As a side note, this proves Theorem 3 for  $\beta = \underline{\alpha}$ .

We can now give a closed recurrence relation  $\varphi_k(0)$ ,  $k \geq 0$ . Using the log-convexity Property 1,

$$\varphi_{k-1}(0) \leq \varphi_{k-1}(-1)^{\underline{\alpha}/(\underline{\alpha}+1)} \varphi_{k-1}(\underline{\alpha})^{1/(\underline{\alpha}+1)} \leq \varphi_{k-1}(-1)^{\underline{\alpha}/(\underline{\alpha}+1)} D^{1/(\underline{\alpha}+1)}.$$

Substituting in (16), we obtain

$$\begin{aligned}\varphi_{k-1}(0) - \varphi_k(0) &\geq \gamma \varphi_{k-1}(-1) \\ &\geq \gamma D^{-1/\underline{\alpha}} \varphi_{k-1}(0)^{1+1/\underline{\alpha}}.\end{aligned}$$

This gives the wanted closed recurrence relation for  $\varphi_k(0)$ ,  $k \geq 0$ . It implies a decay of  $\varphi_k(0)$  as follows: consider the real function  $f(\varphi) = \frac{1}{\varphi^{1/\underline{\alpha}}}$ . It is a convex function on the positive reals, with derivative  $f'(\varphi) = -\frac{1}{\underline{\alpha}} \frac{1}{\varphi^{1+1/\underline{\alpha}}}$ . Using that a convex function is above its tangents, we obtain

$$\begin{aligned}f(\varphi_k(0)) - f(\varphi_{k-1}(0)) &\geq f'(\varphi_{k-1}(0)) (\varphi_k(0) - \varphi_{k-1}(0)) \\ &= -\frac{1}{\underline{\alpha}} \frac{1}{\varphi_{k-1}(0)^{1+1/\underline{\alpha}}} (\varphi_k(0) - \varphi_{k-1}(0)) \\ &\geq \frac{1}{\underline{\alpha}} \gamma D^{-1/\underline{\alpha}}.\end{aligned}$$

By summing this inequality for  $k = 1, \dots, n$ , we obtain

$$\frac{1}{\varphi_n(0)^{1/\underline{\alpha}}} = f(\varphi_n(0)) \geq f(\varphi_0(0)) + \frac{1}{\underline{\alpha}} \gamma D^{-1/\underline{\alpha}} n \geq \frac{1}{\underline{\alpha}} \gamma D^{-1/\underline{\alpha}} n.$$

This implies conclusion 1 of Theorem 1:

$$\mathbb{E} [\|\theta_n - \theta_*\|^2] = \varphi_n(0) \leq \frac{\underline{\alpha}^{\underline{\alpha}}}{\gamma^{\underline{\alpha}}} D \frac{1}{n^{\underline{\alpha}}}. \quad (20)$$

Further,

$$\min_{0 \leq k \leq n} \varphi_k(-1) \leq \min_{\lceil n/2 \rceil \leq k \leq n} \varphi_k(-1) \leq \frac{2}{n} \sum_{k=\lceil n/2 \rceil}^n \varphi_k(-1) \leq \frac{2}{n} \frac{1}{\gamma} \sum_{k=\lceil n/2 \rceil}^n (\varphi_k(0) - \varphi_{k+1}(0)),$$

where in the last step we used (16). Telescoping the sum, we obtain

$$\begin{aligned} \min_{0 \leq k \leq n} \varphi_k(-1) &\leq \min_{\lceil n/2 \rceil \leq k \leq n} \varphi_k(-1) \leq \frac{2}{n} \frac{1}{\gamma} \varphi_{\lceil n/2 \rceil}(0) \\ &\leq \frac{2}{n} \frac{1}{\gamma} \frac{\alpha^\alpha}{\gamma^\alpha} D \frac{1}{\lceil n/2 \rceil^\alpha} \leq 2^{\alpha+1} \frac{\alpha^\alpha}{\gamma^{\alpha+1}} D \frac{1}{n^{\alpha+1}}. \end{aligned} \quad (21)$$

Using that  $\varphi_n(-1) = 2\mathbb{E}[\mathcal{R}(\theta_n)]$ , this gives conclusion 2 of Theorem 1.

### B.3 Proof of Theorem 3

We continue the proof of Theorem 1 to prove Theorem 3. By the log-convexity Property 1, for all  $\beta \in [0, \underline{\alpha}]$ ,

$$\varphi_n(\beta) \leq \varphi_n(0)^{1-\beta/\underline{\alpha}} \varphi_n(\underline{\alpha})^{\beta/\underline{\alpha}}.$$

Using Equations (20) and (19), we obtain

$$\varphi_n(\beta) \leq \frac{\alpha^{\alpha-\beta}}{\gamma^{\alpha-\beta}} D \frac{1}{n^{\alpha-\beta}}.$$

This proves conclusion 1 of the theorem. We now consider the case  $\beta \in [-1, 0)$ . By the log-convexity Property 1,

$$\min_{0 \leq k \leq n} \varphi_k(\beta) \leq \min_{\lceil n/2 \rceil \leq k \leq n} \varphi_k(\beta) \leq \min_{\lceil n/2 \rceil \leq k \leq n} \varphi_k(-1)^{-\beta} \varphi_k(0)^{1+\beta}$$

Using that  $\varphi_k(0)$ ,  $k \geq 0$  is decreasing and the inequality (21), we obtain

$$\begin{aligned} \min_{\lceil n/2 \rceil \leq k \leq n} \varphi_k(-1)^{-\beta} \varphi_k(0)^{1+\beta} &\leq \varphi_{\lceil n/2 \rceil}(0)^{1+\beta} \left( \min_{\lceil n/2 \rceil \leq k \leq n} \varphi_k(-1) \right)^{-\beta} \\ &\leq \varphi_{\lceil n/2 \rceil}(0)^{1+\beta} \left( \frac{2}{n} \frac{1}{\gamma} \varphi_{\lceil n/2 \rceil}(0) \right)^{-\beta} \\ &\leq \frac{2^{-\beta}}{n^{-\beta}} \frac{1}{\gamma^{-\beta}} \varphi_{\lceil n/2 \rceil}(0). \end{aligned}$$

Using finally (20), we obtain conclusion 2 of the theorem

$$\min_{0 \leq k \leq n} \varphi_k(\beta) \leq \frac{2^{-\beta}}{n^{-\beta}} \frac{1}{\gamma^{-\beta}} \frac{\alpha^\alpha}{\gamma^\alpha} D \frac{1}{\lceil n/2 \rceil^\alpha} \leq 2^{\alpha-\beta} \frac{\alpha^\alpha}{\gamma^{\alpha-\beta}} D \frac{1}{n^{\alpha-\beta}}.$$

### C Proof of Theorems 2 and 4

We start in the case (a) where the optimum is irregular:  $\theta_* \notin \Sigma^{-\bar{\alpha}/2}(\mathcal{H})$ . In that case, we give a lower bound in the convergence rate by studying the expected process  $\bar{\theta}_n := \mathbb{E}[\theta_n]$ . Indeed, by Jensen's inequality,

$$\varphi_n(\beta) = \mathbb{E}[\langle \theta_n - \theta_*, \Sigma^{-\beta}(\theta_n - \theta_*) \rangle] \geq \langle \bar{\theta}_n - \theta_*, \Sigma^{-\beta}(\bar{\theta}_n - \theta_*) \rangle. \quad (22)$$

The expectation  $\bar{\theta}_n$  can be interpreted as the (non-stochastic) gradient descent on the population risk  $\mathcal{R}(\theta)$ . Indeed, by taking the expectation in (1), we obtain

$$\bar{\theta}_n - \theta_* = (\text{Id} - \gamma\Sigma)(\bar{\theta}_{n-1} - \theta_*) = -(\text{Id} - \gamma\Sigma)^n \theta_*. \quad (23)$$

Note that as  $\gamma \leq 1/R_0$ ,  $I - \gamma\Sigma$  is a positive definite matrix. Indeed, by the weak definition of  $R_0$  in Remark 3,

$$R_0 \Sigma \succcurlyeq \mathbb{E}[\|X\|^2 X \otimes X] = \mathbb{E}[(X \otimes X)(X \otimes X)] \succcurlyeq \mathbb{E}[X \otimes X]^2 = \Sigma^2,$$

thus  $R_0$  is larger than the operator norm of  $\Sigma$ . Thus  $\gamma\Sigma \preceq \frac{1}{R_0}\Sigma \preceq \text{Id}$ .

In the following, if  $\alpha \in \mathbb{R}$  and  $k \in \mathbb{N}$ ,  $\binom{\alpha}{k}$  denotes the generalized binomial coefficient:  $\binom{\alpha}{k} = \frac{\alpha(\alpha-1)\cdots(\alpha-k+1)}{k!}$ . Fix now  $\alpha \geq 0$ . We have the (formal) power series

$$\begin{aligned} (1+x)^{-\alpha} &= \sum_{k=0}^{\infty} \binom{-\alpha}{k} x^k \\ (1-x)^{-\alpha} &= \sum_{k=0}^{\infty} \binom{-\alpha}{k} (-1)^k x^k = \sum_{k=0}^{\infty} \binom{\alpha+k-1}{k} x^k \\ y^{-\alpha} &= \sum_{k=0}^{\infty} \binom{\alpha+k-1}{k} (1-y)^k. \end{aligned}$$

This last equality holds in  $[0, \infty]$  for  $y \in [0, 1]$ . In that case, all terms of the serie are positive, thus the meaning of the sum is unambiguous.

Note that  $0 \preceq \gamma\Sigma \preceq \text{Id}$ , thus we have, formally,

$$\gamma^{-\alpha}\Sigma^{-\alpha} = \sum_{k=0}^{\infty} \binom{\alpha+k-1}{k} (\text{Id} - \gamma\Sigma)^k.$$

The rigorous meaning of this equality is that for all  $\theta \in \mathcal{H}$ ,

$$\gamma^{-\alpha}\langle \theta, \Sigma^{-\alpha}\theta \rangle = \sum_{k=0}^{\infty} \binom{\alpha+k-1}{k} \langle \theta, (\text{Id} - \gamma\Sigma)^k \theta \rangle.$$

Both terms of the equality can be infinite: here we are using the convention stated in Section 2.1 that implies that  $\langle \theta, \Sigma^{-\alpha}\theta \rangle = \infty \Leftrightarrow \theta \notin \Sigma^{\alpha/2}(\mathcal{H})$ . In particular, take  $\alpha = \bar{\alpha} - \beta$  and  $\theta = \Sigma^{-\beta/2}\theta_*$ :

$$\begin{aligned} \infty &= \gamma^{\beta-\bar{\alpha}} \langle \theta_*, \Sigma^{-\bar{\alpha}}\theta_* \rangle = \sum_{k=0}^{\infty} \binom{\bar{\alpha}-\beta+k-1}{k} \langle \theta_*, \Sigma^{-\beta}(\text{Id} - \gamma\Sigma)^k \theta_* \rangle \\ &= \sum_{n=0}^{\infty} \left[ \binom{\bar{\alpha}-\beta+2n-1}{2n} \langle \theta_*, \Sigma^{-\beta}(\text{Id} - \gamma\Sigma)^{2n} \theta_* \rangle \right. \\ &\quad \left. + \binom{\bar{\alpha}-\beta+2n}{2n+1} \langle \theta_*, \Sigma^{-\beta}(\text{Id} - \gamma\Sigma)^{2n+1} \theta_* \rangle \right]. \end{aligned}$$

Using that  $\binom{\bar{\alpha}-\beta+2n-1}{2n} \leq \binom{\bar{\alpha}-\beta+2n}{2n+1}$  and  $\langle \theta_*, \Sigma^{-\beta}(\text{Id} - \gamma\Sigma)^{2n} \theta_* \rangle \geq \langle \theta_*, \Sigma^{-\beta}(\text{Id} - \gamma\Sigma)^{2n+1} \theta_* \rangle$  and then (23), (22),

$$\begin{aligned} \infty &\leq 2 \sum_{n=0}^{\infty} \binom{\bar{\alpha}-\beta+2n}{2n+1} \langle \theta_*, \Sigma^{-\beta}(\text{Id} - \gamma\Sigma)^{2n} \theta_* \rangle \\ &= 2 \sum_{n=0}^{\infty} \binom{\bar{\alpha}-\beta+2n}{2n+1} \langle \bar{\theta}_n - \theta_*, \Sigma^{-\beta}(\bar{\theta}_n - \theta_*) \rangle \\ &\leq 2 \sum_{n=0}^{\infty} \binom{\bar{\alpha}-\beta+2n}{2n+1} \varphi_n(\beta). \end{aligned}$$

From [14, Equation 5.8.1], we have the formula  $\Gamma(z) = \lim_{k \rightarrow \infty} \frac{k!k^z}{z(z+1)\cdots(z+k)}$  where  $\Gamma$  denotes the Gamma function. Thus as  $n \rightarrow \infty$

$$\binom{\bar{\alpha}-\beta+2n}{2n+1} = \frac{(\bar{\alpha}-\beta)(\bar{\alpha}-\beta+1)\cdots(\bar{\alpha}-\beta+2n)}{(2n+1)(2n)!} \sim \frac{(2n)^{\bar{\alpha}-\beta}}{(2n+1)\Gamma(\bar{\alpha}-\beta)}.$$

As a consequence, the serie  $\sum_n n^{\bar{\alpha}-\beta-1}\varphi_n(\beta)$  diverges. The criteria for the convergence of Riemann series implies that  $\varphi_n(\beta)$  can not be asymptotically dominated by  $1/n^{\bar{\alpha}-\beta+\varepsilon}$  for  $\varepsilon > 0$ .

We now turn to the case (b) where the features are irregular: with positive probability  $p > 0$ ,  $X \notin \Sigma^{\bar{\alpha}/2}(\mathcal{H})$  and  $\langle X, \theta_* \rangle \neq 0$ . With probability  $p$ , the second iterate  $\theta_1 = -\gamma \langle X_1, \theta_* \rangle X_1$  is irregular, i.e.,  $\theta_1 \notin \Sigma^{\bar{\alpha}/2}(\mathcal{H})$ . By a simple shift of the iterates, we show that the effect of the irregularity of the initial condition for this iteration started from  $\theta_1$  has an effect equivalent to the irregularity of the optimum, thus we can apply the result above to lower bound the convergence rate. More precisely, consider the iterates  $\tilde{\theta}_n = \theta_{n+1} - \theta_1$  and  $\tilde{\theta}_* = \theta_* - \theta_1$ . The iteration (1) can be rewritten as  $\tilde{\theta}_n = \tilde{\theta}_{n-1} - \gamma \langle \tilde{\theta}_{n-1} - \tilde{\theta}_*, X_n \rangle X_n$  and  $\tilde{\theta}_0 = 0$ , thus the new sequence  $\tilde{\theta}_n$  satisfies our framework. We can assume that (a) is satisfied, i.e.,  $\theta_* \in \Sigma^{\bar{\alpha}/2}(\mathcal{H})$ . In that case, with probability  $p$ ,  $\tilde{\theta}_* = \theta_* - \theta_1 \notin \Sigma^{\bar{\alpha}/2}(\mathcal{H})$ . Thus by the case above,

$$\begin{aligned} \varphi_n(\beta) &= \mathbb{E} \left[ \langle \theta_n - \theta_*, \Sigma^{-\beta} (\theta_n - \theta_*) \rangle \right] \\ &= \mathbb{E} \left[ \langle \tilde{\theta}_{n-1} - \tilde{\theta}_*, \Sigma^{-\beta} (\tilde{\theta}_{n-1} - \tilde{\theta}_*) \rangle \right] \end{aligned}$$

is not asymptotically dominated by  $1/n^{\bar{\alpha}-\beta+\varepsilon}$ , for  $\varepsilon > 0$ .

## D Robustness to model misspecification

In this section, we describe how the results of Section 2 are perturbed in the case where a linear relation  $Y = \langle \theta_*, X \rangle$  a.s. does not hold. Following the statistical learning framework, we assume a joint law on  $(X, Y)$ . We further assume that there exists a minimizer  $\theta_* \in \mathcal{H}$  of the population risk  $\mathcal{R}(\theta)$ :

$$\theta_* \in \operatorname{argmin}_{\theta \in \mathcal{H}} \left\{ \mathcal{R}(\theta) = \frac{1}{2} \mathbb{E} \left[ (Y - \langle \theta, X \rangle)^2 \right] \right\}.$$

This general framework encapsulates two types of perturbations of the noiseless linear model:

- (variance) The output  $Y$  can be uncertain given  $X$ . For instance, under the noisy linear model,  $Y = \langle \theta_*, X \rangle + Z$ , where  $Z$  is centered and independent of  $X$ . In this case,  $\mathcal{R}(\theta_*) = \mathbb{E}[Z^2] = \mathbb{E}[\operatorname{var}(Y|X)]$ .
- (bias) Even if  $Y$  is deterministic given  $X$ , this dependence can be non-linear:  $Y = \psi(X)$  for some non-linear function  $\psi$ . Then  $\mathcal{R}(\theta_*)$  is the squared  $L^2$  distance of the best linear approximation to  $\psi$ :  $\mathcal{R}(\theta_*) = \frac{1}{2} \mathbb{E} \left[ (\psi(X) - \langle \theta_*, X \rangle)^2 \right]$ .

In the general framework, the optimal population risk is a combination of both sources

$$\mathcal{R}(\theta_*) = \frac{1}{2} \mathbb{E} [\operatorname{var}(Y|X)] + \frac{1}{2} \mathbb{E} \left[ (\mathbb{E}[Y|X] - \langle \theta_*, X \rangle)^2 \right].$$

Given i.i.d. realizations  $(X_1, Y_1), (X_2, Y_2), \dots$  of  $(X, Y)$ , the SGD iterates are defined as

$$\theta_0 = 0, \quad \theta_n = \theta_{n-1} - \gamma (\langle \theta_{n-1}, X_n \rangle - Y_n) X_n. \quad (24)$$

Apart from the new definition of  $\theta_*$ , we repeat the same assumptions as in Section 2: let  $R_0 < \infty$  be such that  $\|X\|^2 \leq R_0$  a.s., denote  $\Sigma = \mathbb{E}[X \otimes X]$  and  $\varphi_n(\beta) = \mathbb{E} \left[ \langle \theta_n - \theta_*, \Sigma^{-\beta} (\theta_n - \theta_*) \rangle \right]$ .

**Theorem 5.** *Under the assumptions of Theorem 1,*

$$\min_{k=0, \dots, n} \mathbb{E} [\mathcal{R}(\theta_k) - \mathcal{R}(\theta_*)] \leq 2 \frac{C'}{n^{\underline{\alpha}+1}} + 2R_0 \gamma \mathcal{R}(\theta_*),$$

where  $C'$  is the same constant as in Theorem 1.

The take-home message is that if we consider the excess risk  $\mathcal{R}(\theta_k) - \mathcal{R}(\theta_*)$ , we get the upper bound of the form  $2C'n^{-(\underline{\alpha}+1)}$ , analog to Theorem 1, but with an additional constant term  $2R_0\gamma\mathcal{R}(\theta_*)$ . This term can be small if  $\mathcal{R}(\theta_*)$  is small, that is if the problem is close to the noiseless linear model, or if the step-size  $\gamma$  is small. In the finite horizon setting, one can optimize  $\gamma$  as a function of the scheduled number of steps  $n$  in order to balance both terms in the upper bound. As  $C' \propto \gamma^{-(\underline{\alpha}+1)}$ , the optimal choice is  $\gamma \propto n^{-(\underline{\alpha}+1)/(\underline{\alpha}+2)}$  which gives a rate  $\min_{k=0, \dots, n} \mathbb{E} [\mathcal{R}(\theta_k) - \mathcal{R}(\theta_*)] = O(n^{-(\underline{\alpha}+1)/(\underline{\alpha}+2)})$ .



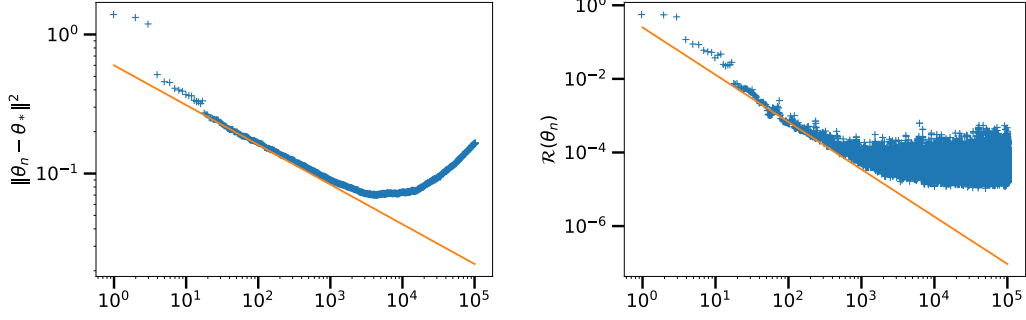

Figure 4: In blue +, evolution of  $\|\theta_n - \theta_*\|^2$  (left) and  $\mathcal{R}(\theta_n)$  (right) as functions of  $n$ , for the problems with parameters  $d = 10^5$ ,  $\beta = 1.4$ ,  $\delta = 1.2$ . The orange lines represent the curves  $D/n^{\alpha_*}$  (left) and  $D'/n^{\alpha_*+1}$  (right).

In the theorem below, we study the SGD iterates  $\theta_n$  in terms of the power norms  $\varphi_n(\beta)$ ,  $\beta \in [-1, \underline{\alpha} - 1]$ , in particular in term of the reconstruction error  $\varphi_n(0) = \mathbb{E}[\|\theta_n - \theta_*\|^2]$  if  $\underline{\alpha} \geq 1$ . Note that the population risk  $\mathcal{R}(\theta)$  is a quadratic with Hessian  $\Sigma$ , minimized at  $\theta_*$ , thus

$$\mathbb{E}[\mathcal{R}(\theta_n) - \mathcal{R}(\theta_*)] = \frac{1}{2} \mathbb{E}[\langle \theta_n - \theta_*, \Sigma(\theta_n - \theta_*) \rangle] = \frac{1}{2} \varphi_n(-1).$$

Thus the theorem below extends Theorem 5.

**Theorem 6.** *Under the assumptions of Theorem 1,*

1. for all  $\beta \geq 0$ ,  $\beta \leq \underline{\alpha} - 1$ ,

$$\varphi_n(\beta) \leq 2 \frac{C(\beta)}{n^{\alpha-\beta}} + 4R_0^{1-(\beta+1)/\alpha} R_{\underline{\alpha}}^{(\beta+1)/\alpha} \gamma \mathcal{R}(\theta_*),$$

2. for all  $\beta \in [-1, 0)$ ,  $\beta \leq \underline{\alpha} - 1$ ,

$$\min_{k=0,1,\dots,n} \varphi_k(\beta) \leq 2 \frac{C'(\beta)}{n^{\alpha-\beta}} + 4R_0^{1-(\beta+1)/\alpha} R_{\underline{\alpha}}^{(\beta+1)/\alpha} \gamma \mathcal{R}(\theta_*),$$

where  $C, C'$  are the same constants as in Theorem 3.

This theorem is proved at the end of this section. We expect the condition  $\beta \leq \underline{\alpha} - 1$  to be necessary. More precisely, when  $\mathcal{R}(\theta_*)$  is positive, we expect the error  $\theta_n - \theta_*$  to diverge under the norm  $\|\Sigma^{-\beta/2} \cdot \|\text{ if } \beta > \underline{\alpha} - 1$ . In particular, this would imply that the reconstruction error diverges when  $\underline{\alpha} < 1$ .

In Figure 4, we show how the simulations of Appendix A are perturbed in the presence of additive noise. We consider the noisy linear model  $Y = \langle \theta_*, X \rangle + \sigma^2 Z$ , where  $X \sim \mathcal{N}(0, \Sigma)$  and  $Z \sim \mathcal{N}(0, 1)$  are independent. As in the previous simulations, we consider the case  $\Sigma = \sum_{i=1}^d i^{-\beta} e_i \otimes e_i$  and  $\theta_* = \sum_{i=1}^d i^{-\delta} e_i$  with here  $d = 10^5$ ,  $\beta = 1.4$ ,  $\delta = 1.2$ . In the noiseless case  $\sigma^2 = 0$ , we have shown that the rate of convergence was given by the polynomial exponent  $\alpha_* = \min\left(1 - \frac{1}{\beta}, \frac{2\delta-1}{\beta}\right)$ . These predicted rates are represented by the orange lines in the plots. In blue, we show the results of our simulations with some additive noise with variance  $\sigma^2 = 2 \times 10^{-4}$ . The exponent  $\alpha_*$  still describes the behavior of SGD in the initial phase, but in the large  $n$  asymptotic the population risk  $\mathcal{R}(\theta_n)$  stagnates around the order of  $\sigma^2$ . Both of these qualitative behaviors are predicted by Theorem 5. Moreover, the reconstruction error  $\|\theta_n - \theta_*\|$  diverges for large  $n$ .

*Proof of Theorems 5 and 6.* Note that in this proof, we use the strong assumptions of regularity of the feature vector  $X$ . We do not know whether it is possible to prove the same result under the weak assumptions of Remark 3.

Our proof strategy is the following: we decompose the SGD iterates sequence  $\theta_n$  as a sum of sequences  $\theta_n = \nu_n + \sum_{l=1}^n \eta_n^{(l)}$ , where each of the auxiliary sequences is interpreted as the iterates of some

SGD iteration under a noiseless linear model. We thus apply the results of Section 2 to control these auxiliary sequences and obtain the presented bound.

Define  $\varepsilon_n = Y_n - \langle \theta_*, X_n \rangle$ , the error of the best linear estimator. Then Equation (24) can be rewritten as

$$\theta_0 = 0, \quad \theta_n = \theta_{n-1} - \gamma \langle \theta_{n-1} - \theta_*, X_n \rangle X_n + \gamma \varepsilon_n X_n.$$

We see this iteration as an additively perturbed version of the iteration

$$\nu_0 = 0, \quad \nu_n = \nu_{n-1} - \gamma \langle \nu_{n-1} - \theta_*, X_n \rangle X_n,$$

studied in Section 2. To understand the effect of the additive noise, define for all  $l \geq 1$ ,

$$\eta_l^{(l)} = \gamma \varepsilon_l X_l, \quad \eta_n^{(l)} = \eta_{n-1}^{(l)} - \gamma \langle \eta_{n-1}^{(l)}, X_n \rangle X_n, \quad n > l.$$

Then

$$\theta_n = \nu_n + \sum_{l=1}^n \eta_n^{(l)}. \quad (25)$$

Indeed, this last equation is checked by induction:  $\theta_0 = 0 = \nu_0$ , and if the equation is satisfied for some  $n \geq 0$ ,

$$\begin{aligned} \theta_{n+1} &= \theta_n - \gamma \langle \theta_n - \theta_*, X_{n+1} \rangle X_{n+1} + \gamma \varepsilon_{n+1} X_{n+1} \\ &= \nu_n + \sum_{l=1}^n \eta_n^{(l)} - \gamma \left\langle \nu_n + \sum_{l=1}^n \eta_n^{(l)} - \theta_*, X_{n+1} \right\rangle X_{n+1} + \eta_{n+1}^{(n+1)} \\ &= [\nu_n - \gamma \langle \nu_n - \theta_*, X_{n+1} \rangle X_{n+1}] + \sum_{l=1}^n [\eta_n^{(l)} - \gamma \langle \eta_n^{(l)}, X_{n+1} \rangle X_{n+1}] + \eta_{n+1}^{(n+1)} \\ &= \nu_{n+1} + \sum_{l=1}^n \eta_{n+1}^{(l)} + \eta_{n+1}^{(n+1)}. \end{aligned}$$

We use the decomposition (25) to study  $\varphi_n(\beta)$ . Using the triangle inequality,

$$\begin{aligned} \varphi_n(\beta) &= \mathbb{E} \left[ \left\| \Sigma^{-\beta/2} \left( \nu_n + \sum_{l=1}^n \eta_n^{(l)} \right) \right\|^2 \right] \\ &\leq \mathbb{E} \left[ \left( \left\| \Sigma^{-\beta/2} \nu_n \right\| + \left\| \Sigma^{-\beta/2} \sum_{l=1}^n \eta_n^{(l)} \right\| \right)^2 \right] \\ &\leq 2\mathbb{E} \left[ \left\| \Sigma^{-\beta/2} \nu_n \right\|^2 \right] + 2\mathbb{E} \left[ \left\| \Sigma^{-\beta/2} \sum_{l=1}^n \eta_n^{(l)} \right\|^2 \right] \end{aligned} \quad (26)$$

The first term is studied in Section 2. We detail the analysis of the second term. Note that

$$\begin{aligned} \eta_n^{(l)} &= (I - \gamma X_n \otimes X_n) \eta_{n-1}^{(l)} = \dots = (I - \gamma X_n \otimes X_n) \dots (I - \gamma X_{l+1} \otimes X_{l+1}) \eta_l^{(l)} \\ &= (I - \gamma X_n \otimes X_n) \dots (I - \gamma X_{l+1} \otimes X_{l+1}) \gamma \varepsilon_l X_l. \end{aligned} \quad (27)$$

Thus if  $l < l'$ ,

$$\begin{aligned} \mathbb{E} \left[ \left\langle \eta_n^{(l)}, \Sigma^{-\beta} \eta_n^{(l')} \right\rangle \right] &= \mathbb{E} \left[ \left\langle \mathbb{E} \left[ \eta_n^{(l)} \mid X_{l+1}, \dots, X_n \right], \Sigma^{-\beta} \eta_n^{(l')} \right\rangle \right] \\ &= \mathbb{E} \left[ \left\langle (I - \gamma X_n \otimes X_n) \dots (I - \gamma X_{l+1} \otimes X_{l+1}) \gamma \mathbb{E}[\varepsilon_l X_l], \Sigma^{-\beta} \eta_n^{(l')} \right\rangle \right] \end{aligned}$$

Note that by definition of  $\theta_*$ ,  $0 = \nabla \mathcal{R}(\theta_*) = -\mathbb{E}[(Y_l - \langle \theta_*, X_l \rangle) X_l] = -\mathbb{E}[\varepsilon_l X_l]$  thus we obtain that the cross products  $\mathbb{E} \left[ \left\langle \eta_n^{(l)}, \Sigma^{-\beta} \eta_n^{(l')} \right\rangle \right]$  are zero. This gives

$$\mathbb{E} \left[ \left\| \Sigma^{-\beta/2} \sum_{l=1}^n \eta_n^{(l)} \right\|^2 \right] = \sum_{l=1}^n \mathbb{E} \left[ \left\| \Sigma^{-\beta/2} \eta_n^{(l)} \right\|^2 \right].$$

Note that from Equation (27),  $\eta_n^{(l)}$  and  $\eta_{n-l+1}^{(1)}$  are equal in law. Thus

$$\mathbb{E} \left[ \left\| \Sigma^{-\beta/2} \sum_{l=1}^n \eta_n^{(l)} \right\|^2 \right] = \sum_{l=1}^n \mathbb{E} \left[ \left\| \Sigma^{-\beta/2} \eta_{n-l+1}^{(1)} \right\|^2 \right] = \sum_{l=1}^n \mathbb{E} \left[ \left\| \Sigma^{-\beta/2} \eta_l^{(1)} \right\|^2 \right]. \quad (28)$$

This last quantity is the sum of the expected squared power norms

$$\varphi_l'(\beta) := \mathbb{E} \left[ \left\| \Sigma^{-\beta/2} \eta_l^{(1)} \right\|^2 \right]$$

of the SGD iterates  $\eta_l^{(1)}$ ,  $l \geq 1$  on a noiseless linear model, with initialization  $\eta_1^{(1)} = \gamma \varepsilon_1 X_1$ . When  $\beta = -1$ , this control is given by (17): with our notation here, this gives

$$\sum_{l=1}^n \varphi_l'(-1) \leq \sum_{l=1}^{\infty} \varphi_l'(-1) \leq \frac{1}{\gamma} \varphi_1'(0). \quad (29)$$

When  $\beta = \underline{\alpha} - 1$ , a similar control can be obtained from (18) which gives:

$$2\gamma \varphi_{l-1}'(\underline{\alpha} - 1) \leq \varphi_{l-1}'(\underline{\alpha}) - \varphi_l'(\underline{\alpha}) + \gamma^2 R_{\underline{\alpha}} \varphi_{l-1}'(-1).$$

By summing these inequalities for  $l = 2, 3, \dots$ , we obtain,

$$\begin{aligned} 2\gamma \sum_{l=1}^{\infty} \varphi_l'(\underline{\alpha} - 1) &\leq \varphi_1'(\underline{\alpha}) + \gamma^2 R_{\underline{\alpha}} \sum_{l=1}^{\infty} \varphi_l'(-1) \\ &\leq \varphi_1'(\underline{\alpha}) + \frac{R_{\underline{\alpha}}}{R_0} \varphi_1'(0) \end{aligned} \quad (30)$$

Note that using the strong assumption of regularity of the feature vectors,

$$\begin{aligned} \varphi_1'(0) &= \mathbb{E} \left[ \left\| \gamma \varepsilon_1 X_1 \right\|^2 \right] \leq \gamma^2 R_0 \mathbb{E} [\varepsilon_1^2] = 2\gamma^2 R_0 \mathcal{R}(\theta_*), \\ \varphi_1'(\underline{\alpha}) &= \mathbb{E} \left[ \left\| \Sigma^{-\underline{\alpha}/2} \gamma \varepsilon_1^2 X \right\|^2 \right] \leq \gamma^2 R_{\underline{\alpha}} \mathbb{E} [\varepsilon_1^2] = 2\gamma^2 R_{\underline{\alpha}} \mathcal{R}(\theta_*). \end{aligned}$$

We use these expressions to simply further (29) and (30):

$$\begin{aligned} \sum_{l=1}^n \varphi_l'(-1) &\leq 2\gamma R_0 \mathcal{R}(\theta_*), \\ \sum_{l=1}^{\infty} \varphi_l'(\underline{\alpha} - 1) &\leq 2\gamma R_{\underline{\alpha}} \mathcal{R}(\theta_*). \end{aligned}$$

If  $\beta \in [-1, \underline{\alpha} - 1]$ , we use the log-convexity Property 1 and Hölder's inequality: decompose  $\beta = (1 - \lambda)(-1) + \lambda(\underline{\alpha} - 1)$  with  $\lambda = (\beta + 1)/\underline{\alpha}$ ,

$$\begin{aligned} \sum_{l=1}^{\infty} \varphi_l'(\beta) &\leq \sum_{l=1}^{\infty} \varphi_l'(-1)^{1-\lambda} \varphi_l'(\underline{\alpha} - 1)^\lambda \\ &\leq \left( \sum_{l=1}^n \varphi_l'(-1) \right)^{1-\lambda} \left( \sum_{l=1}^{\infty} \varphi_l'(\underline{\alpha} - 1) \right)^\lambda \\ &\leq (2\gamma R_0 \mathcal{R}(\theta_*))^{1-\lambda} (2\gamma R_{\underline{\alpha}} \mathcal{R}(\theta_*))^\lambda \\ &= 2\gamma R_0^{1-\lambda} R_{\underline{\alpha}}^\lambda \mathcal{R}(\theta_*). \end{aligned} \quad (31)$$

Putting back together Equations (26), (28) and (31), we obtain

$$\varphi_n(\beta) \leq 2\mathbb{E} \left[ \left\| \Sigma^{-\beta/2} \nu_n \right\|^2 \right] + 4\gamma R_0^{1-\lambda} R_{\underline{\alpha}}^\lambda \mathcal{R}(\theta_*)$$

The theorem follows the application of Theorem 3 to the sequence  $\nu_n$  in order to control the first term.  $\square$

## E Proof of Corollary 1

We apply Theorem 1 in the following way. Denote  $\theta_n = x_n - x_0$ ,  $\theta_* = x_* - x_0$ , where  $x_* = \frac{1}{N} \mathbf{1}$  is the function identically equal to  $\frac{1}{N}$ . These vectors belong to the Hilbert space  $\mathcal{H} = \ell^2(\mathcal{V})$ . Denote  $\langle \cdot, \cdot \rangle$  and  $\|\cdot\|$  the  $\ell^2(\mathcal{V})$  scalar product and norm. Denote also  $X_n = e_{v_n} - e_{w_n} \in \mathcal{H}$  and  $\gamma = 1/2$ . Note that  $\Sigma = \mathbb{E}[X_n X_n^\top] = \frac{1}{M} L$ . The graph is connected thus  $\lambda_0 = 0$  is the unique zero eigenvalue of  $L$  [11, Lemma 1.7]. The corresponding eigenspace is the space of constant functions. The vectors  $\theta_n, X_n, \theta_*$  are orthogonal to the null space of  $\Sigma$ , thus the quantities of the form  $\langle \theta_n, \Sigma^{-\alpha} \theta_n \rangle, \langle X_n, \Sigma^{-\alpha} X_n \rangle, \langle \theta_*, \Sigma^{-\alpha} \theta_* \rangle$  are finite.

We have  $\theta_0 = 0$  and the averaging update step (7) can be written as

$$\theta_n = \theta_{n-1} - \gamma \langle \theta_{n-1} - \theta_*, X_n \rangle X_n.$$

The last form makes explicit the parallel with Equation (1). To apply Theorem 1, we check that its assumptions are satisfied. First,  $\|X_n\|^2 = 2$  a.s. thus can take  $R_0 = 2$  and then  $\gamma = 1/R_0$ . Second, we seek  $\alpha > 0$  such that  $\|\Sigma^{-\alpha/2} \theta_*\| < \infty$  and  $R_\alpha = \sup_{\{v,w\} \in \mathcal{E}} \langle e_v - e_w, \Sigma^{-\alpha} (e_v - e_w) \rangle < \infty$ . In the following, we bound these constants for all  $\alpha < d/2$ , thus giving decay rates for the expected squared distance to optimum of the form  $n^{-\alpha}$  for all  $\alpha < d/2$ . However, our bounds of the constants  $\|\Sigma^{-\alpha/2} \theta_*\|$  and  $R_\alpha$  diverge as  $\alpha \rightarrow d/2$ . Nevertheless, by estimating how fast the bounds diverge as  $\alpha \rightarrow d/2$ , we obtain a decay rate of  $n^{-d/2}$  by paying an additional logarithmic factor.

Fix  $0 < \alpha < d/2$ . We check assumptions (a) and (b).

(a)

$$\|\Sigma^{-\alpha/2} \theta_*\|^2 = M^\alpha \langle x_* - x_0, L^{-\alpha} (x_* - x_0) \rangle = M^\alpha \sum_{i=1}^{N-1} \lambda_i^{-\alpha} \langle x_* - x_0, u_i \rangle^2.$$

First, as  $x_*$  is a constant vector,  $\langle x_*, u_i \rangle$  is zero for all  $i \geq 1$ . Second,  $x_0 = e_{v_*}$ . Thus

$$\begin{aligned} \|\Sigma^{-\alpha/2} \theta_*\|^2 &= M^\alpha \sum_{i=1}^{N-1} \lambda_i^{-\alpha} u_i(v_*)^2 \\ &= M^\alpha \int_{(0,\infty)} d\sigma_{v_*}(\lambda) \lambda^{-\alpha} \\ &= M^\alpha \int_{(0,\infty)} d\sigma_{v_*}(\lambda) \int_0^\infty ds \mathbf{1}_{\{s \leq \lambda^{-\alpha}\}} \\ &= M^\alpha \int_0^\infty ds \int_{(0,\infty)} d\sigma_{v_*}(\lambda) \mathbf{1}_{\{\lambda \leq s^{-1/\alpha}\}} \\ &= M^\alpha \int_0^\infty ds \sigma_{v_*}((0, s^{-1/\alpha}]). \end{aligned}$$

The graph  $G$  is of spectral dimension  $d$  with constant  $V$ , thus  $\sigma_{v_*}((0, s^{-1/\alpha}]) \leq V^{-1} s^{-\frac{d}{2\alpha}}$ . However, if  $s < \delta_{\max}^{-\alpha}$ , it is better to use a more naive bound. As all eigenvalues of  $L$  are smaller or equal than  $\delta_{\max}$ ,  $\sigma_{v_*}((0, s^{-1/\alpha}]) \leq \sigma_{v_*}((0, \delta_{\max}]) \leq V^{-1} \delta_{\max}^{d/2}$ . Then

$$\begin{aligned} \|\Sigma^{-\alpha/2} \theta_*\|^2 &\leq M^\alpha \left[ \int_0^{\delta_{\max}^{-\alpha}} ds V^{-1} \delta_{\max}^{d/2} + \int_{\delta_{\max}^{-\alpha}}^\infty ds V^{-1} s^{-\frac{d}{2\alpha}} \right] \\ &= M^\alpha V^{-1} \delta_{\max}^{d/2-\alpha} \frac{d}{d-2\alpha}. \end{aligned}$$

(b) Let  $\{v, w\} \in E$ . As  $\|\Sigma^{-\alpha/2} \cdot\|$  is a norm, by the triangle inequality,

$$\begin{aligned} \|\Sigma^{-\alpha/2} (e_v - e_w)\|^2 &= \|\Sigma^{-\alpha/2} [(x_* - e_w) - (x_* - e_v)]\|^2 \\ &\leq \left( \|\Sigma^{-\alpha/2} (x_* - e_w)\| + \|\Sigma^{-\alpha/2} (x_* - e_v)\| \right)^2 \\ &\leq 2 \left( \|\Sigma^{-\alpha/2} (x_* - e_w)\|^2 + \|\Sigma^{-\alpha/2} (x_* - e_v)\|^2 \right). \end{aligned}$$

We bound the two quantities as above. We obtain

$$R_\alpha = \sup_{v,w \in E} \|\Sigma^{-\alpha/2}(e_v - e_w)\|^2 \leq 2M^\alpha V^{-1} \delta_{\max}^{d/2-\alpha} \frac{d}{d-2\alpha}.$$

Theorem 1 gives

$$\begin{aligned} \mathbb{E} [\|x_n - x_*\|^2] &= \mathbb{E} [\|\theta_n - \theta_*\|^2] \leq \frac{\alpha^\alpha}{\gamma^\alpha} \left( \|\Sigma^{-\alpha/2}\theta_*\|^2 + \frac{R_\alpha}{R_0} \|\theta_*\|^2 \right) \frac{1}{n^\alpha} \\ &\leq \frac{(d/2)^\alpha}{(1/2)^\alpha} \left( M^\alpha V^{-1} \delta_{\max}^{d/2-\alpha} \frac{d}{d-2\alpha} + M^\alpha V^{-1} \delta_{\max}^{d/2-\alpha} \frac{d}{d-2\alpha} \|\theta_*\|^2 \right) \frac{1}{n^\alpha} \end{aligned}$$

Note that  $\|\theta_*\|_2^2 \leq 1$  and recall the scaling  $t = n/M$ :

$$\mathbb{E} [\|x_n - x_*\|^2] \leq d^{d/2+1} V^{-1} \delta_{\max}^{d/2-\alpha} \frac{1}{d/2-\alpha} \frac{1}{t^\alpha}.$$

This bound is valid for all  $\alpha < \frac{d}{2}$ . Choose  $\alpha = \frac{d}{2} - \frac{\log 2}{\log t}$ .

$$\mathbb{E} [\|x_n - x_*\|^2] \leq d^{d/2+1} V^{-1} \delta_{\max}^{\log 2 / \log t} \frac{\log t}{\log 2} \frac{2}{t^{d/2}}$$

As we assume  $t \geq 2$ ,  $\delta_{\max}^{\log 2 / \log t} \leq \delta_{\max}$ . Thus we obtain conclusion 1.

The proof of 2 is similar. Theorem 1 gives

$$\begin{aligned} \min_{0 \leq k \leq n} \mathbb{E} \left[ \frac{1}{2} \sum_{\{v,w\} \in \mathcal{E}} (x_k(v) - x_k(w))^2 \right] &= \min_{0 \leq k \leq n} \mathbb{E} \left[ \frac{1}{2} \langle x_k - x_*, L(x_k - x_*) \rangle \right] \\ &= M \min_{0 \leq k \leq n} \mathbb{E} \left[ \frac{1}{2} \langle \theta_k - \theta_*, \Sigma(\theta_k - \theta_*) \rangle \right] \\ &\leq 2^\alpha \frac{\alpha^\alpha}{\gamma^{\alpha+1}} \left( \|\Sigma^{-\alpha/2}\theta_*\|^2 + \frac{R_\alpha}{R_0} \|\theta_*\|^2 \right) \frac{1}{n^\alpha} \\ &\leq 2^{\alpha+1} d^\alpha V^{-1} \delta_{\max}^{d/2-\alpha} \frac{d}{d/2-\alpha} \frac{1}{t^{\alpha+1}}. \end{aligned}$$

Taking again  $\alpha = \frac{d}{2} - \frac{1}{2 \log t}$  and  $t \geq 2$ ,

$$\min_{0 \leq k \leq n} \mathbb{E} \left[ \frac{1}{2} \sum_{\{v,w\} \in \mathcal{E}} (x_k(v) - x_k(w))^2 \right] \leq 2^{d/2+1} d^{d/2} V^{-1} \delta_{\max} \frac{d \log t}{\log 2} \frac{2}{t^{d/2+1}}$$

This gives conclusion 2 of the corollary.

## F Proof of Proposition 1

The graph  $\mathbb{T}_\Lambda^d$  is invariant by translation, thus the spectral measure  $\sigma_v$  is the same for all vertices  $v \in \mathcal{V}$ . Thus

$$|\mathcal{V}| \sigma_v(d\lambda) = \sum_{w \in \mathcal{V}} \sigma_w(d\lambda) = \sum_{w \in \mathcal{V}} \sum_{i=0}^{N-1} u_i(w)^2 \delta_{\lambda_i} = \sum_{i=0}^{N-1} \left( \sum_{w \in \mathcal{V}} u_i(w)^2 \right) \delta_{\lambda_i} = \sum_{i=0}^{N-1} \delta_{\lambda_i}.$$

Thus

$$\sigma_v((0, E]) = \frac{1}{\Lambda^d} |\{0 < i \leq N-1 \mid \lambda_i \leq E\}|.$$

We need to bound the number of eigenvalues of the Laplacian of  $\mathbb{T}_\Lambda^d$  below some fixed value  $E$ . The eigenvalues of the Laplacian of the circle  $\mathbb{T}_\Lambda^1$  are  $1 - \cos\left(\frac{2\pi i}{\Lambda}\right)$ ,  $i \in \mathbb{Z}$ ,  $-\Lambda/2 < i \leq \Lambda/2$  [11,

Example 1.5]. As  $\mathbb{T}_\Lambda^d$  is the Cartesian product  $\mathbb{T}_\Lambda^1 \times \cdots \times \mathbb{T}_\Lambda^1$  (with  $d$  terms), the eigenvalues of the Laplacian of the torus  $\mathbb{T}_\Lambda^d$  are the

$$1 - \cos\left(\frac{2\pi i_1}{\Lambda}\right) + \cdots + 1 - \cos\left(\frac{2\pi i_d}{\Lambda}\right), \quad i_1, \dots, i_d \in \mathbb{Z}, \quad -\frac{\Lambda}{2} < i_1, \dots, i_d \leq \frac{\Lambda}{2}.$$

For  $y \in [-\pi, \pi]$ ,  $1 - \cos(y) \geq \frac{2}{\pi^2}y^2$ . Thus

$$\begin{aligned} 1 - \cos\left(\frac{2\pi i_1}{\Lambda}\right) + \cdots + 1 - \cos\left(\frac{2\pi i_d}{\Lambda}\right) \leq E &\Rightarrow \frac{2}{\pi^2} \left[ \left(\frac{2\pi i_1}{\Lambda}\right)^2 + \cdots + \left(\frac{2\pi i_d}{\Lambda}\right)^2 \right] \leq E \\ &\Leftrightarrow i_1^2 + \cdots + i_d^2 \leq \frac{E\Lambda^2}{8}. \end{aligned}$$

We need to count the number of integer points in the Euclidean ball centered at 0 and of radius  $\sqrt{E/8}\Lambda$  in  $\mathbb{R}^d$ . This problem is famously known as Gauss circle problem. For our purposes, a crude estimate suffices: there exists a constant  $C(d)$ , depending only on the dimension  $d$ , such that for all radius  $R$ , the number of integer points in the ball of radius  $R$  is smaller than  $1 + C(d)R^d$ . This leads to the final estimate

$$\begin{aligned} \sigma_v((0, E]) &= \frac{1}{\Lambda^d} \left| \left\{ (i_1, \dots, i_d) \in \left( \mathbb{Z} \cap \left( -\frac{\Lambda}{2}, \frac{\Lambda}{2} \right) \right)^d \setminus \{0\} \text{ such that} \right. \right. \\ &\quad \left. \left. 1 - \cos\left(\frac{2\pi i_1}{\Lambda}\right) + \cdots + 1 - \cos\left(\frac{2\pi i_d}{\Lambda}\right) \leq E \right\} \right| \\ &\leq \frac{1}{\Lambda^d} \left| \left\{ (i_1, \dots, i_d) \in \mathbb{Z}^d \setminus \{0\} \mid i_1^2 + \cdots + i_d^2 \leq \frac{E\Lambda^2}{8} \right\} \right| \\ &\leq \frac{1}{\Lambda^d} C(d) \left( \frac{E\Lambda^2}{8} \right)^{d/2} = \frac{C(d)}{8^{d/2}} E^{d/2}. \end{aligned}$$

This proves the proposition with  $V(d) = 8^{d/2}/C(d)$ .
